# Supplementary material for: Photochemical processes developed in composites based on MoS2, poly(ortho-toluidine), and reduced graphene oxide
Source: Royal Society of Chemistry journal article supplement (doi:10.1039/d5na01164g), 2026-05-27
Supplement: d5na01164g1.pdf [file d5na01164g1.pdf]

*Supplementary Information*

**Photochemical processes developed in the composites based on MoS<sub>2</sub>, poly(ortho-toluidine), and reduced graphene oxide**

Madalina Cercel<sup>1,2</sup>, Andreea Nila<sup>2</sup>, Ion Smaranda<sup>2</sup>, Andreea Androne<sup>2</sup>, Teodora Burlanescu<sup>2</sup>, Adam Lörinczi<sup>2</sup>, Catalin Negrila<sup>2</sup>, Matei Elena<sup>2</sup> and Mihaela Baibarac<sup>2\*</sup>

<sup>1</sup>*University of Bucharest, Faculty of Physics, Atomistilor Street 405A, Magurele, Romania.*

<sup>2</sup>*National Institute of Materials Physics, Laboratory of Optical Processes in Nanostructured Materials, Atomistilor street 405A, Magurele, Romania.*

*Corresponding author: Dr. M. Baibarac*

*E-mail: [barac@infim.ro](mailto:barac@infim.ro)*

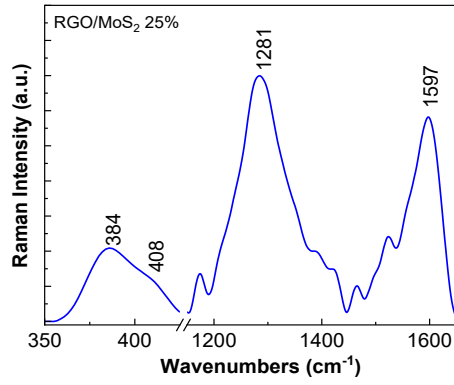

*a*

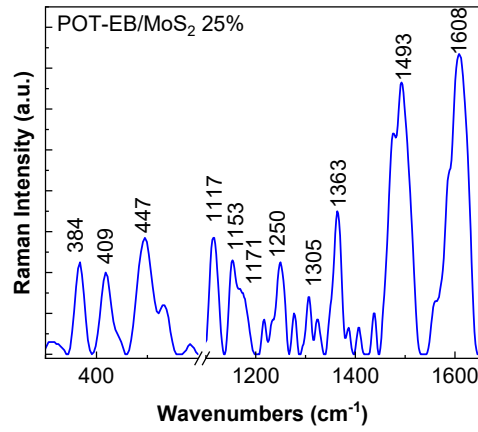

*b*

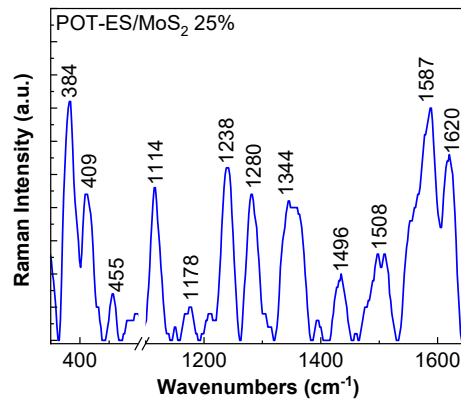

*c*

**Figure S1.** Raman spectra of the MoS<sub>2</sub>/RGO (a), POT-EB/MoS<sub>2</sub> (b), and POT-ES/MoS<sub>2</sub> (c) composites, all having a concentration of MoS<sub>2</sub> equal to 25 wt.%.

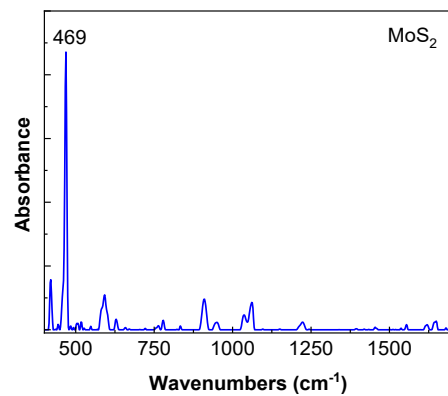

*a*

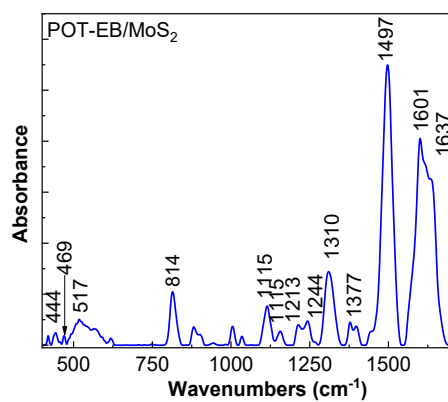

*b*

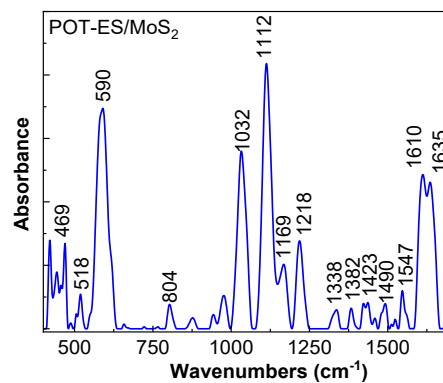

*c*

**Figure S2.** FTIR spectra of MoS<sub>2</sub> (a), and the POT-EB/MoS<sub>2</sub> (b) and POT-ES/MoS<sub>2</sub> (c) composites, which have a MoS<sub>2</sub> concentration equal to 25 wt.%

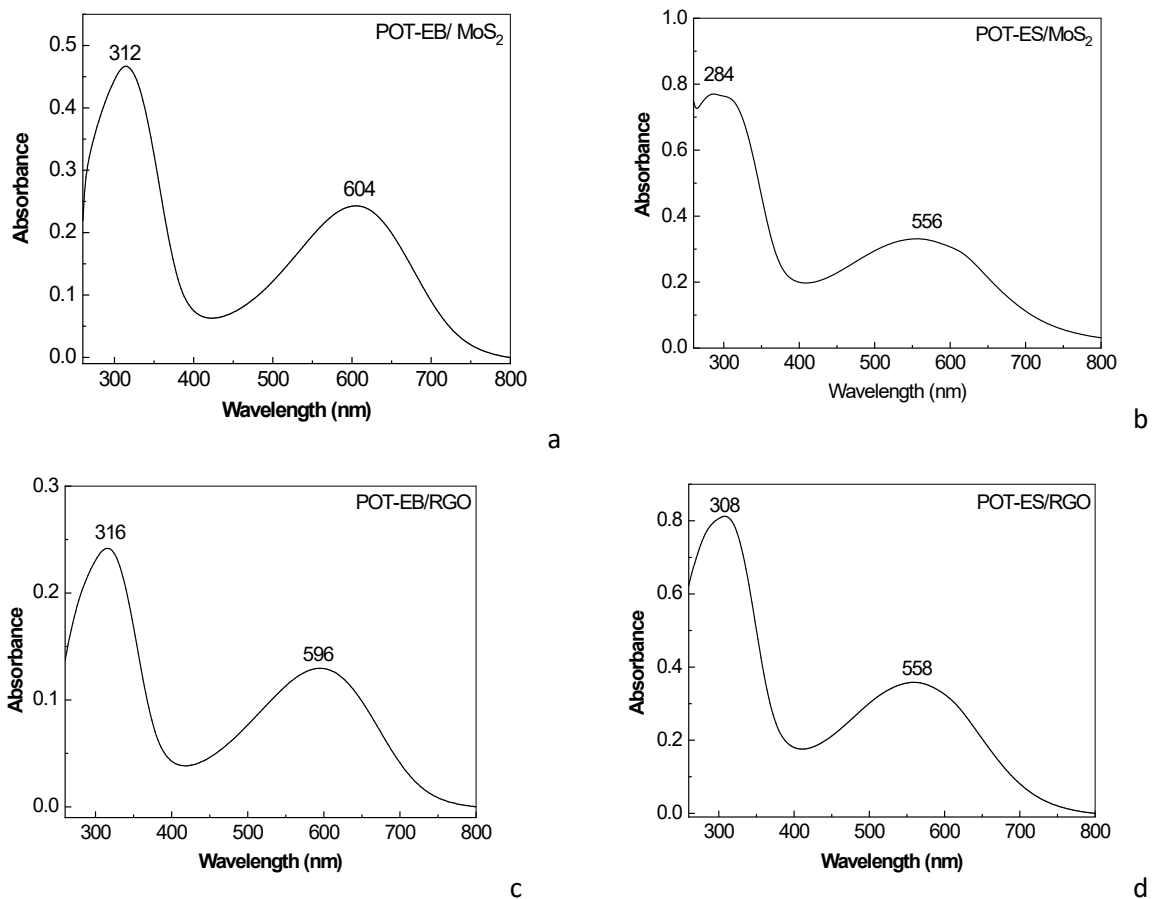

**Figure S3.** UV-VIS spectra of the POT-EB/MoS<sub>2</sub> (a), POT-ES/MoS<sub>2</sub> (b), POT-EB/RGO (c), and POT-ES/RGO (d) composites, which have a MoS<sub>2</sub> and RGO concentration equal to 25 wt.%

The synthesis of the POT-EB/RGO and POT-ES/RGO composites took place similarly to the protocol described in the main text for the ternary composites [23]. As observed in Figures S3c and S3d, in the case of the POT-EB/RGO and POT-ES/RGO composites, the characteristic RGO band in the 260–270 nm region is no longer visible in the UV-Vis spectrum due to the complete overlap with the intense POT absorptions, which dominate the UV region, as well as the blurring of the  $\pi$ - $\pi^*$  transitions of RGO as a result of the electronic interactions between the two constituents. In addition, the absorption of RGO is much weaker than that of POT-EB and POT-ES, thus being masked in the composite.
